# Supplementary material for: Outcomes in patients undergoing periprocedural interruption of warfarin or direct oral anticoagulants
Source: PubMed Central journal article supplement — J Thromb Haemost. 2022 Sep 1;20(11):2571–8. doi: 10.1111/jth.15850 (PMC9804988; doi:10.1111/jth.15850), 2022-09-01

# Appendix

## Standardized Differences Plot – Bleeding Events, Bridged Warfarin

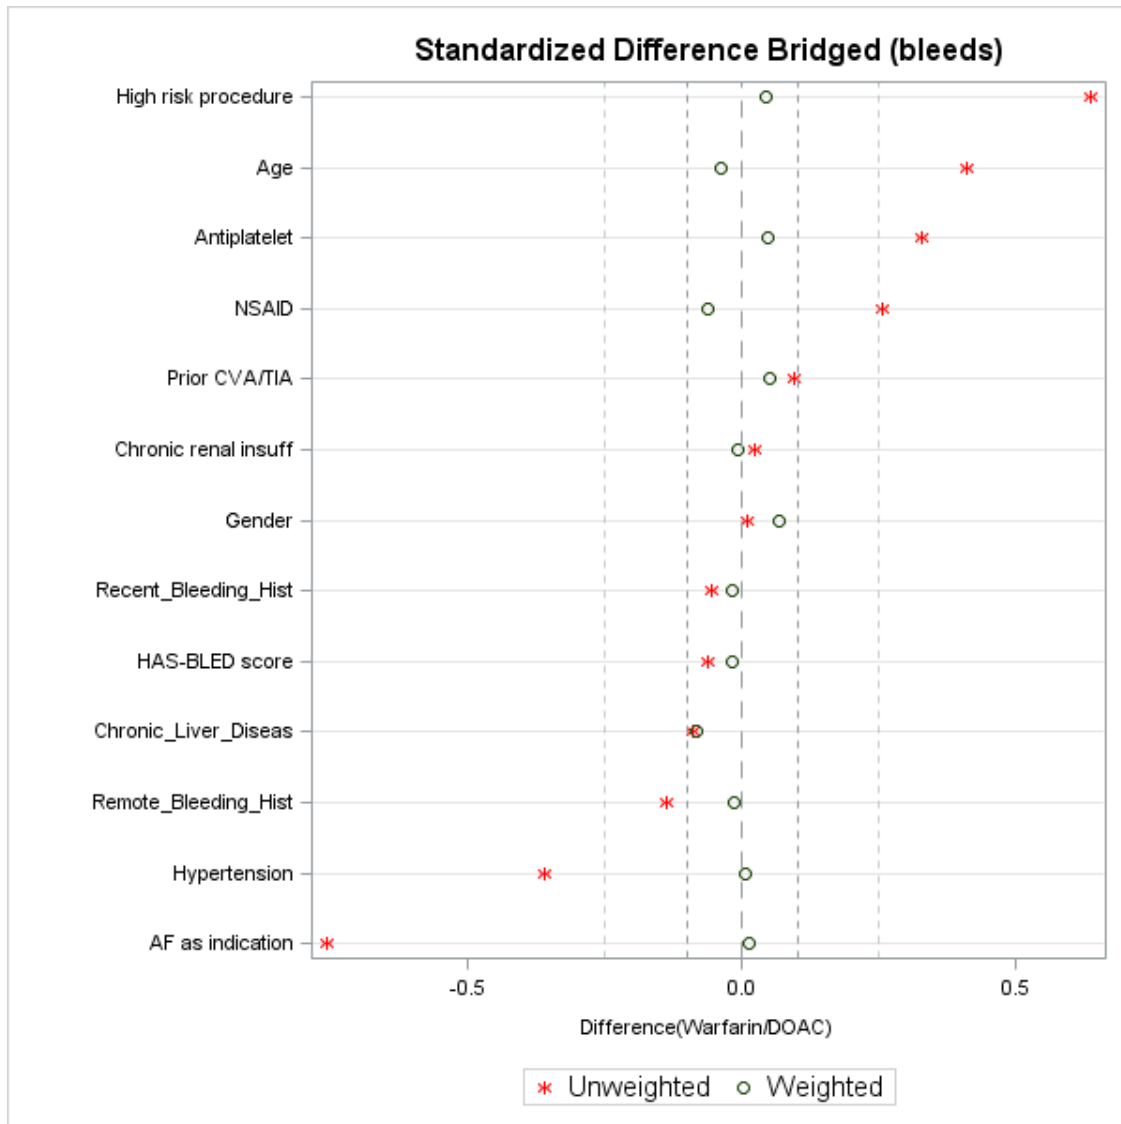

### Standardized Differences Plot – Bleeding Events, Non-Bridged Warfarin

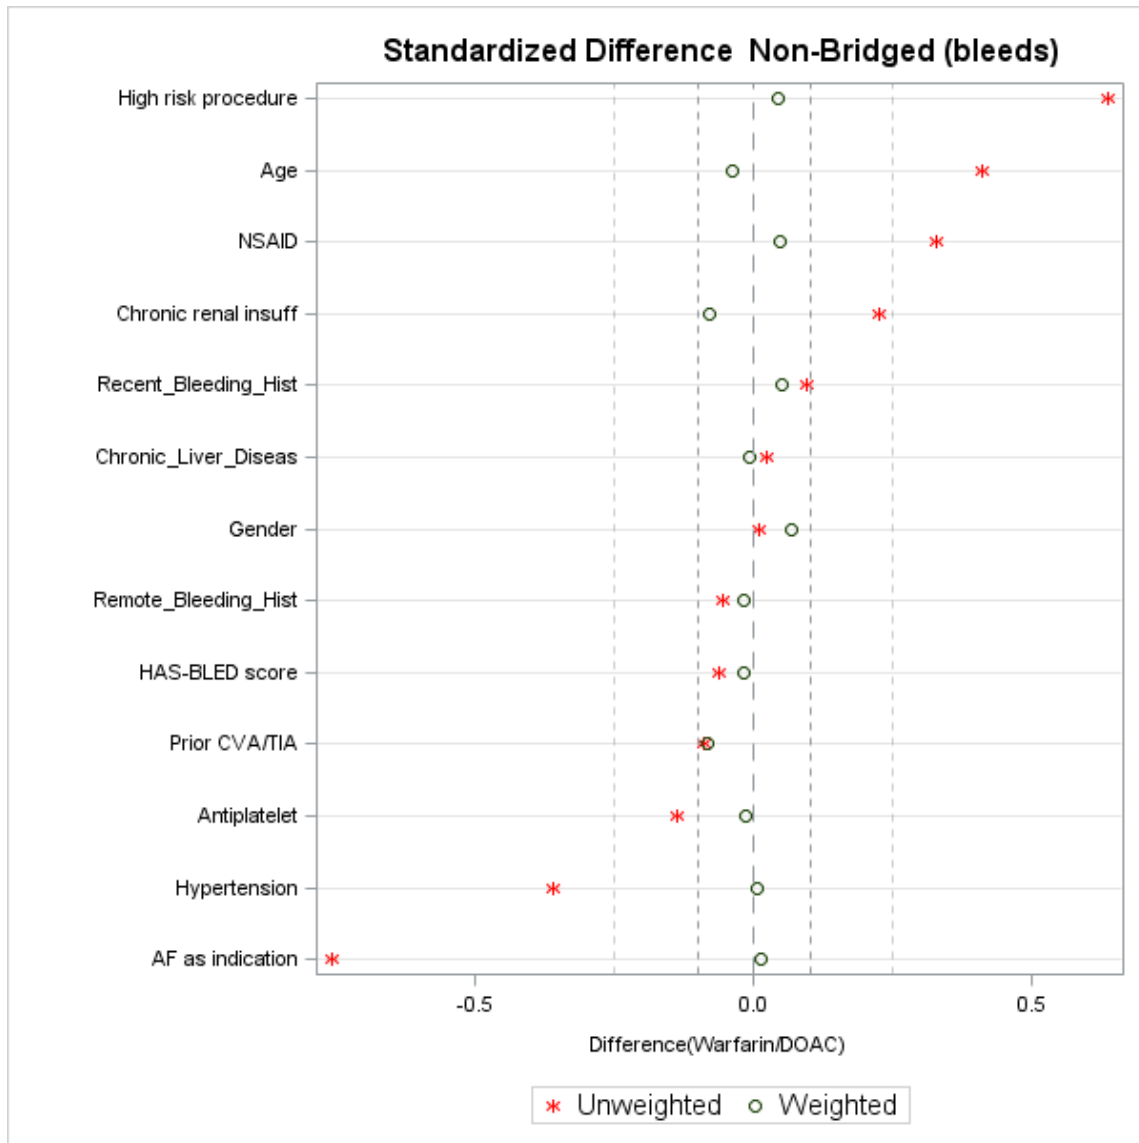

### Standardized Differences Plot – Thromboembolic Events, Bridged Warfarin

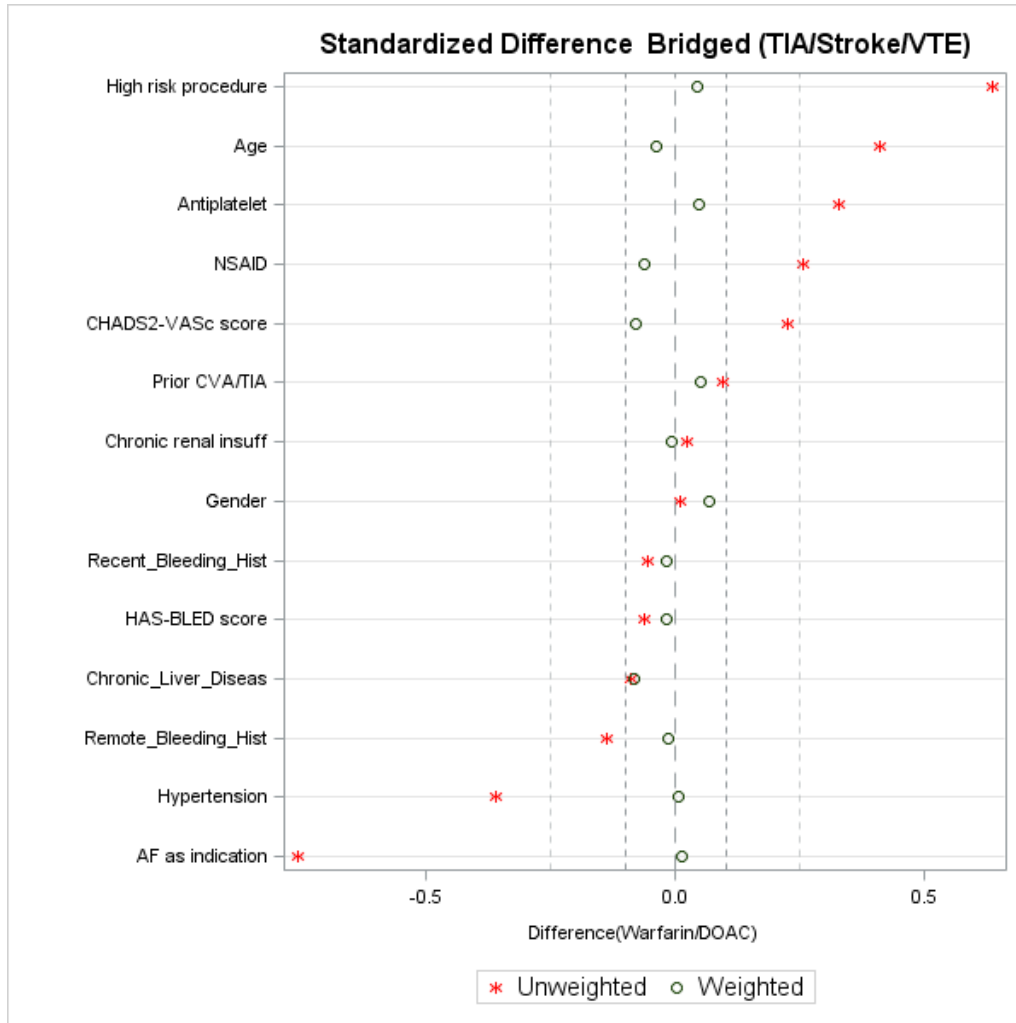

### Standardized Differences Plot – Thromboembolic Events, Non-Bridged Warfarin

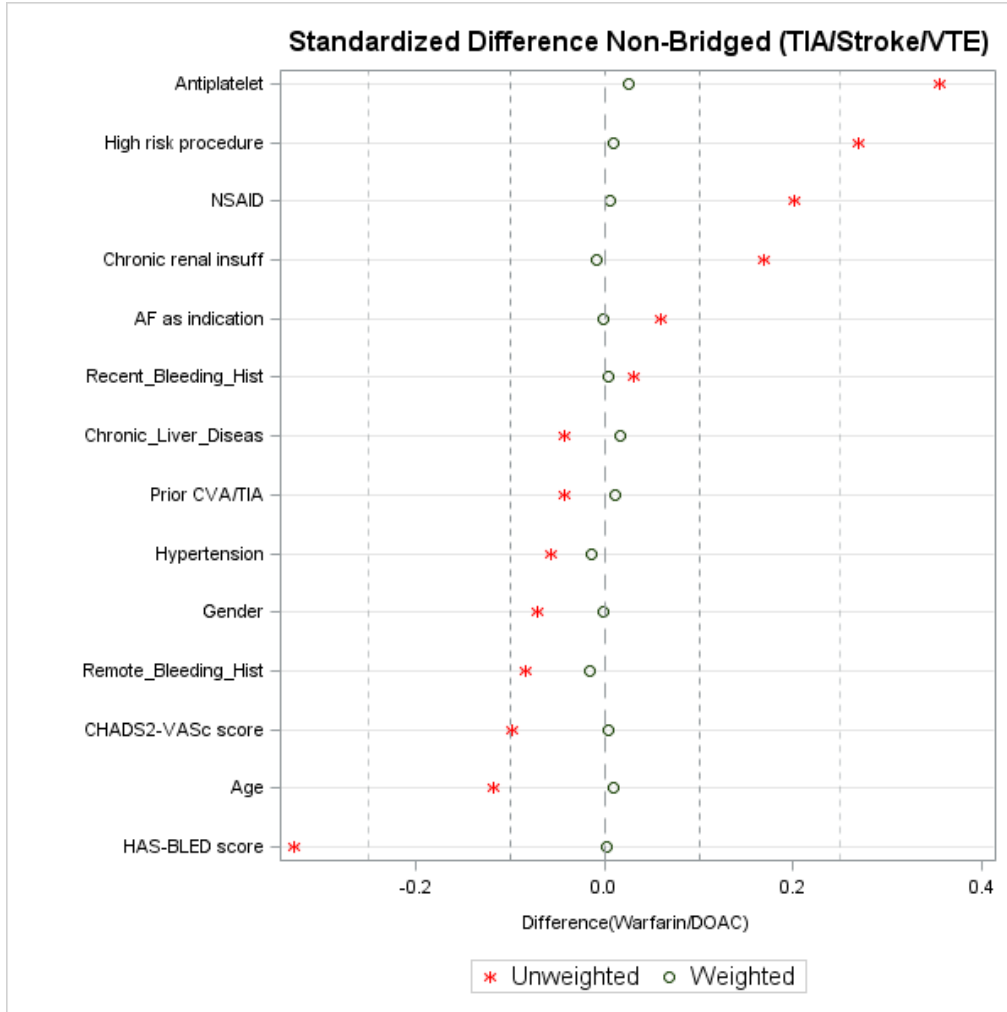

Supplement: JTH-20-2571-s001.pdf [file JTH-20-2571-s001.pdf]
